# Supplementary material
Source: PubMed Central journal article supplement (PMC2990131)
Supplement: supp_tpc.110.078824_Hanson_Supplemental_DataFinal.pdf [file supp_tpc.110.078824_Hanson_Supplemental_DataFinal.pdf]

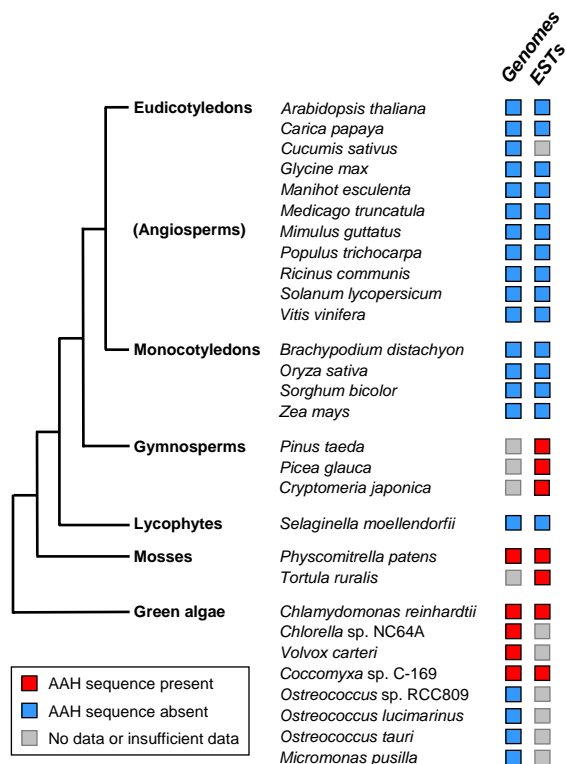

**Supplemental Figure 1.** The Distribution of AAH-Like Sequences in Plant Genomes and EST Collections.

Genomes were searched using tblastn, with eukaryotic or bacterial AAHs as query, at JGI <http://genome.jgi-psf.org/>, Phytozome <http://www.phytozome.net/>, and the Sol Genomics Network <http://solgenomics.net/index.pl>. EST collections were searched at JGI and dbEST <http://www.ncbi.nlm.nih.gov/nucest>. The 'no data or insufficient data' category refers to species for which no genome sequence is available, or for which  $<0.5-1.0 \times 10^5$  EST sequences are available.

Supplemental Data. Pribat et al. (2010). Plant Cell 10.1105/tpc.110.078824

|                         |   |                                           |
|-------------------------|---|-------------------------------------------|
| TrpH_Rattus             | 1 |                                           |
| TyrH_Rattus             | 1 | MPTPSAPSPQPKGFRRVAVSEQDAKQAEAVTSP         |
| PheH_Rattus             | 1 |                                           |
| PheH_Caenorhabditis     | 1 |                                           |
| TrpH_Caenorhabditis     | 1 |                                           |
| TyrH_Caenorhabditis     | 1 |                                           |
| PheH_Drosophila         | 1 |                                           |
| TyrH_Drosophila         | 1 | MMAVAAAQKNREMFIAKKSYSIENGYPS              |
| TrpH_Drosophila         | 1 | MSASGKSLGLLWLYRSGEQEWAVKQGSPLHLQLKKDSTTSG |
| PheH_Pseudomonas_       | 1 |                                           |
| PheH_Chromobacterium    | 1 |                                           |
| PheH_Colwellia          | 1 |                                           |
| PheH_Chloroflexus       | 1 |                                           |
| PheH/TrpH_Dictyostelium | 1 |                                           |
| Pinus                   | 1 |                                           |
| Physcomitrella          | 1 |                                           |
| Chlamydomonas           | 1 |                                           |
| Chlorella               | 1 |                                           |

  

|                         |    |                                                               |
|-------------------------|----|---------------------------------------------------------------|
| TrpH_Rattus             | 1  | MIEDNKENKDHSSERGRVTLTIFS-----                                 |
| TyrH_Rattus             | 33 | RFIGRRQSLIEDARKEREAAAAAAAAAVASSEPGNPLEAVVFEERDGNVAVLNLFLSLRG- |
| PheH_Rattus             | 1  | MAAVLLENGVLSRKLSDFGQETSyiEDNSNQNGAIS--LIFS-----               |
| PheH_Caenorhabditis     | 1  | MPPAGQDDLDFLKYAMESYVADVNADIGKTT--LVFT-----                    |
| TrpH_Caenorhabditis     | 1  | MIANLPDHTRIKHLEI-----                                         |
| TyrH_Caenorhabditis     | 1  | MRCQKILQQLNDEGIEVIFTANDVTPIEFSITLSTDP TLS-----                |
| PheH_Drosophila         | 1  | MYQRQVSFDKPTRVEDSAYIVEGVDIKAARNTCLIFSPRI-----                 |
| TyrH_Drosophila         | 29 | RRRSLVDDARFETLVVKQTKQTVLEEARSKANDYGLTEDEITLANAASESSDAEAMQSA   |
| TrpH_Drosophila         | 41 | SSSHPSLGRNASAPPEPRLAIGGGQDNGRQHSPGERISITFT-----               |
| PheH_Pseudomonas        | 1  |                                                               |
| PheH_Chromobacterium    | 1  |                                                               |
| PheH_Colwellia          | 1  |                                                               |
| PheH_Chloroflexus       | 1  |                                                               |
| PheH/TrpH_Dictyostelium | 1  | MESNTNSQGGIIPQSYHSSITFISISK-----                              |
| Pinus                   | 1  | MAFPLQKTFICS-----                                             |
| Physcomitrella          | 1  | MAMEVGYLRHSTTII-----                                          |
| Chlamydomonas           | 1  | MLALRQ-----                                                   |
| Chlorella               | 1  | MGS-----                                                      |

  

|                         |    |                                                             |
|-------------------------|----|-------------------------------------------------------------|
| TrpH_Rattus             | 24 | ----LKNEVGGIKAKIKIFQENHVNLHIESRKSRRNSEFEIFVDCDINREQ--LNDI   |
| TyrH_Rattus             | 92 | ----TKPSSSRVAVKFETFEAKIHLETRPAQRP-----LAGSPHLEY-FVRFE       |
| PheH_Rattus             | 41 | ----LKEEVGALAKVLRLEFEENDINLTHIESRPSRLNKDEY-EFFTYLDKRTKPVLSI |
| PheH_Caenorhabditis     | 36 | ----LREKAGALAEETKLFQAHVNLSHIESRPSRLMKDAMRCSLNLKLTIVRTEL     |
| TrpH_Caenorhabditis     | 17 | ----RDSQDGSSKTMVLLLE--IELPHYG-----KQEAAMLRLNGLD--VHEV       |
| TyrH_Caenorhabditis     | 42 | -----NFVSDIQQMSSAKVQICHVETRNEAS--HDVLLACKATKNQ-LHSA         |
| PheH_Drosophila         | 41 | ----RRCPAELANILAILRKHDIKICILSRILAPWFRVSS-CFWRRMENRS--LGKS   |
| TyrH_Drosophila         | 89 | ALVVRLKEGISSGRILKAIETFHGTQHVESRQSRVEGVDDHDLIKLDMTRGN-LQLI   |
| TrpH_Drosophila         | 85 | ----LRNQVGNLARAQVFQELGINVLLHLELSPLEMATNQADVLDVVECDQRR--LDQV |
| PheH_Pseudomonas        | 1  |                                                             |
| PheH_Chromobacterium    | 1  |                                                             |
| PheH_Colwellia          | 1  |                                                             |
| PheH_Chloroflexus       | 1  |                                                             |
| PheH/TrpH_Dictyostelium | 28 | ----GSDKIGGLLEYEIIKKHNINITRIESRPSKTEKKDY-DFFLDLEYPTE--NNKE  |
| Pinus                   | 13 | ----NGQSFPCS--NGRSTSLASDLKFOR-----LNKP--FILRV               |
| Physcomitrella          | 16 | ----NGLCCNCDPKPRGARRVQTRLPGTLCVLDFTTSSKAKLKKPSQREIFLTSRK    |
| Chlamydomonas           | 7  | ----GALLSAR--GGQTHDNLQLCAGPSRR-----PRARWISSAPRP             |
| Chlorella               | 4  | ----CRLAADVD--GGQTGHPTARLDAGLSR-----P                       |

```

TrpH_Rattus      77 FPLLSHTTVLSVSDSPD--QLPEKEDVMEVPE-----WFPFKISDLDLFCANRVLVYGS
TyrH_Rattus     137 VPSGDLAALLSSVRRVS--DDVRSAREDKVP-----WFPFKVSELDKCHHLVTKEDP
PheH_Rattus     95 IKSLRNDIG-ATVHELSS--RDKE---KNTVP-----WFPRTIQEQLDRFANQILSYGA
PheH_Caenorhabditis 91 LSI SNKKLRRRFLPKTG--TPKTKQNKDSVP-----WFPQKINDIDQFANRILSYGA
TrpH_Caenorhabditis 58 SSTIRPTAIKEQYTEPG-----SDDATATGS-----EWFPSIYDLDLCAKRVIMYGA
TyrH_Caenorhabditis 88 ELLTQNHVALTKFSIFA--KKSLSDEKNQSQI-----WFPRHISELDQCSKCIKMEP
PheH_Drosophila 92 HRCEGAML-ATLTSSC--RELQGVMPAVP-----WFPFRIRDLDRFANQILSYGS
TyrH_Drosophila 148 RSLRQS---GSFSSMN--LMADNNLNVKAP-----WFPKHASELDNCNHLMTKMEP
TrpH_Drosophila 138 VKMLNREVASVNYTSVNTQGLARAPSLACSDFDGMVWFPFKISDLDLKAQN-VLMYGS
PheH_Pseudomonas 1
PheH_Chromobacterium 1
PheH_Colwellia 1
PheH_Chloroflexus 1
PheH/TrpH_Dictyostelium 80 VEKVIKDL E-KGVKAT--TLQESSNQTYAP-----WFPFKISDLDLFAKRVLEMCS
Pinus           47 GSMQIRN-SPKEHPRVS-----SAAVLPP-----VPSIHDIP-NGDHLGFGA
Physcomitrella 69 RLNQIQAVSTA EKERA-----DKTSTPP-----IPSSIHDIS-NGDHLGFGA
Chlamydomonas  45 STLVERHIRPQASTASD-----ATTSTSQ-----RILSIHDVD-NG-QILGFGA
Chlorella      30 EGLLRGH-----SI SEVD--NS-KILGFGS
    
```

```

TrpH_Rattus      128 ELDADHPGFKDNYVRRRKYFAELAMNYKHGDP I PKI E F T E E E I K T W G T I F R E L N K L V E T
TyrH_Rattus     187 DLDL D H P G F S D Q V Y R Q R R K L I A E I A F Q V K H G E P I P H V E Y T A E E I A T W K E V Y V T L K G L V A T
PheH_Rattus     141 ELDADHPGFKDPVYRARRKQFAD I A Y N Y R H G Q P I P R V E Y T E E E K Q T W G T V F R T L K A L V K T
PheH_Caenorhabditis 141 ELDADHPGFKDMTYRERKFFAD I A F N F K H G D L I P T I T Y T D E E I A T W R L V Y N E L T V M Y E K
TrpH_Caenorhabditis 105 GLDADHPGFKDTEYRQRMMFAELALN Y K H G E P I P R T E Y T S S E R K T W G T I Y R K L R E L H K K
TyrH_Caenorhabditis 138 T T D P R H P G H G D V A N I A R R K F L N Q A L E F K F G D E I G Y V D Y T E E E H A T W K A V Y E K L G D L H L S
PheH_Drosophila 141 ELDADHPGFTDPEYAKRRKYFAD I G Y N Y K H G Q P I P H V D Y T K E E I E T W C I I F R N L T K L V K T
TyrH_Drosophila 194 D L D M N H P G F A D K V Y R Q R R K E I A E I A F A V K Y G D P I P F I D Y S D V E V K T W R S V F K T V Q D L A E K
TrpH_Drosophila 197 ELDADHPGFKDPVYRKRREQFSALANNFKHCNP I P R V O Y T P E E N K T W G T V F L E I H R L V L
PheH_Pseudomonas 1 M K T T Q Y V A R Q P D D N G F I H -----Y P E T E H Q V W N T L I T R Q L K V I E G
PheH_Chromobacterium 1 M N D R A D F V V P D I T T R K N V G L S H D A N D F T L P Q E L D R Y S A E D H A T W A T L Y Q R C K L L P G
PheH_Colwellia 1 M A K T T K Y V S K V P D E H G F I E -----W S T E E N L I W Q E L F T R Q I A C I K D
PheH_Chloroflexus 1 M T T I A P P A M P -----A Y T E E D H L V W A T L C A R O V P R L D R
PheH/TrpH_Dictyostelium 129 D L T S D H P G A S D P V Y R E R R E I A K L A S T V K H G D E I P R I D Y T E E E I K T W C V V Y N R L K E L E P T
Pinus           89 N L A E D H P G M H D E E Y K R R R S C I A D L A K K H K I G E P I P E I N Y T T E E A H V W A E V L T K L S E L Y P S
Physcomitrella 112 D L T S D H P G M H D L E Y K R R R S R I A D L A K I H K I G E P I P C V D Y T S E E I R V W G H V L D T L V D L V E T
Chlamydomonas  87 D L A E D H P G F H D P A Y K Q R R A W L A E M A K T H R I G T P I P D V E Y S P A E W A T W D A V L E E L S G L L E P Q
Chlorella      52 D L S E D H P G M L D T F Y K Q R R A D I C N L A R E H R I G E P I P R I E Y T P D E V A V W G T V L P Q L K E L I P R
    
```

```

TrpH_Rattus      188 H A C R E Y L R N L P L L S K Y C G Y R E D N V P Q L E D V S N F L K E R T G F S I R P V A - G Y L S P R D F L S G L A
TyrH_Rattus     247 H A C R E H L E G F O L L E R Y C G Y R E D S I P Q L E D V S R F L K E R T G F Q L R P V A - G L L S A R D F L A S L A
PheH_Rattus     201 H A C Y E H N H I F P L L E K Y C G Y R E D N I P Q L E D V S Q F L Q T C T G F R L R P V A - G L L S S R D F L G G L A
PheH_Caenorhabditis 201 N A C Q E F N Y I F P L L Q Q N C G F G P D R I P Q L Q D V S D F L K D C T G Y T I R P V A - G L L S P R D F L A G W A
TrpH_Caenorhabditis 165 H A C K Q E L D N F E L L E R H C G Y S E N N I P Q L E D I C K F L K A K T G F R V R P V A - G Y L S A R D F L A G L A
TyrH_Caenorhabditis 198 H T C A V Y R Q N L K I L Q E E K V L T A D R I P Q I R D V N K F L Q K K T G F E L R C S - G L L S A R D F L A S L A
PheH_Drosophila 201 H A C R E Y N H V F P L L V D N C G Y R E D N I P Q L E D V S N F L R D C T G F T L R P V A - G L L S S R D F L A G L A
TyrH_Drosophila 254 H A C A E Y R A A F Q K L Q D E Q I F V E T R I P Q L Q E M S D F L R K N T G F S L R E A A - G L L T A R D F L A S L A
TrpH_Drosophila 257 H A V P E Y M D N W P E L E K Y C G Y R E D N V P Q L Q D V S V L K R K T G F Q L R P V A - G Y L S P R D F L S G L A
PheH_Pseudomonas 41 R A C Q E Y L D G I E Q L G ---L P H E R I P Q L D E I N R V L Q A T G W R V A R V P - A L I P F Q T F F E L L A
PheH_Chromobacterium 58 R A C D E F L E G L E R L E ---V D A D R V P D F N K L N E K L M A A T G W K I V A V P - G L I P D D V F F E H L A
PheH_Colwellia 42 K A C D E Y H E G L A K L N ---L P T D R I P Q L D E V S K V L K V S T G W E C Y P V P - A L I G F G E F F R L L S
PheH_Chloroflexus 34 Y A C R L F R E G F R K L N ---L D L Q R I P D P V Q V S E R L A A M T G W T L C D A Q N E Y L N P T E W F E H L A
PheH/TrpH_Dictyostelium 189 N A C Q H A Y I F P L L E Q N C G Y S P D N I P Q L Q D I S N F L Q E C T G W R I R P V Q - G L L S A R D F L N G L A
Pinus           149 H A C K E Y L E S F P L F N ---F S P N K I P Q L E E L S Q L Q H Y T G W K I R P V A - G L L H P R Q F L N G L A
Physcomitrella 172 H A C K E Y L N C Y E L F N ---F K P N Y I P Q L Q E L S E V L E R S T G W H I R P V A - G L L H P R D F L N G L A
Chlamydomonas  147 H A C R E Y L R C L T L F D ---F R K G R V P Q L E E M N T V L R S T T G W T V R P V A - G L M H P R H F L A G L A
Chlorella      112 H A C K E F L R C W Q L F D ---F R E D E V P Q L E D L S L V L Q Q Q T G F R I R P V A - G L L H P R L F L Q G L A
    
```

TrpH\_Rattus 247 FRVPHCTQYVRHSSDPLYTPEPDTCHELLGHVPLLAEPSSFAQFSQEIIGLASLGASDEE-TV  
 TyrH\_Rattus 306 FRVPHCTQYIRHSSPMHSEPEDCCHELLGHVPLMADRFTAQFSQDIIGLASLGASDE-BI  
 PheH\_Rattus 260 FRVPHCTQYIRHSGKPMYTPEPDTCHELLGHVPLFSDRSFAQFSQEIIGLASLGAPDE-YI  
 PheH\_Caenorhabditis 260 FRVPHSTQYIRHSSAPKYTPEPDTCHELLGHVPLFADVFBAQFSQEIIGLASLGAPDD-VI  
 TrpH\_Caenorhabditis 224 YRVFCTQYVRHSDPFYTPEDTVHELMGHMPLFADPFAQFSQEIIGLASLGASDEE-DL  
 TyrH\_Caenorhabditis 257 FRVPHCTQYIRHSSPMHSEPEDDIHELLGHVPLMFSDDLQAQMSQDIGLMSLGASDE-HI  
 PheH\_Drosophila 260 FRVPHCTQYIRHSGKPMYTPEPDTCHELMGHVPLFADPFAQFSQEIIGLASLGAPDD-YI  
 TyrH\_Drosophila 313 FRIFOSTQYVRHVNSPYHTPEPDSIHELLGHMPLLADPSSFAQFSQEIIGLASLGASDE-BI  
 TrpH\_Drosophila 316 FRVPHCTQYIRHSSDPLYTPEPDCHELLGHMPLLANSSFAQFSQEIIGLASLGASDA-DI  
 PheH\_Pseudomonas 96 SQQFPVATIRTPPELDYLQEPDIFHEIFGHCPLLTNPWFAEFHTYCKLGLKASKE-ER  
 PheH\_Chromobacterium 113 NRREFPVITWLRREPHQLDYLQEPDVFDLFGHVPLLLINPVFADWLEAYCKGGVKAKALGAL  
 PheH\_Colwellia 97 EKKFPVATIRSRREEMDYLQEPDIFHEIFGHCPLLTNSSFANYTEAYCKMGLNATKE-QR  
 PheH\_Chloroflexus 90 ERREFPVITWLRREPHQLDYLQEPDIFHEIFGHCPLLTNSSFANYTEAYCKMGLNATKE-QR  
 PheH/TrpH\_Dictyostelium 248 FRVPHATQYIRHSSVPLYTPEPDCHELLGHVPLLADPFAQFSQEIIGLASLGASDE-DI  
 Pinus 204 FRIFPHSTQYIRHSGKPMYTPEPDTCHELLGHMPLLVHPEFADLAWAICQASLGASEK-DI  
 Physcomitrella 227 FRIFPHSTQYVRHSGNPMYTPEPDTCHEVGHVPLLADPFAQFSQEIIGLASLGASEK-DI  
 Chlamydomonas 202 FRIFPHSTQYMRHSGKPSYTPEPDTVHELIGHVPLLADPAVARLITIGLASLADDDK-QI  
 Chlorella 167 YKIFPHSTQYMRHVSRPDYTPEPDTVHELIGHVPLLADPAFAELVHAIGLASLGADEK-QI

TrpH\_Rattus 306 QKLATCYFTVFEGLCKQ-----DQDRVFGAGLLSSISLIRHALLSGH----  
 TyrH\_Rattus 365 EKLSTVYWFVFEGLCKQN-----CELKAYGAGLLSSYGELLHSLISEE----  
 PheH\_Rattus 319 EKLATLYWFTVFEGLCKEG-----DSLKAYGAGLLSSYFGLQYCLSDK----  
 PheH\_Caenorhabditis 319 EKLATLYWFTVFEGLCKQOD-----EKKAYGAGLLSSYFGLQYALSDK----  
 TrpH\_Caenorhabditis 283 KKLATLYFVSIIEFGLSSDAAADSPVKENGSNHERFKVYVAGLLSSAGELQHAIVEGS----  
 TyrH\_Caenorhabditis 316 EKLSTVYWFVFEGLCKED-----EKLKATGAGLLSAYGELMHACSDA----  
 PheH\_Drosophila 319 EKLSTVYWFVFEGLCKE-----CELKAYGAGLLSSYFGLQYCLTDK----  
 TyrH\_Drosophila 372 EKLSTVYWFVFEGLCKEHE-----CQIKAYGAGLLSSYFGLLHATSDK----  
 TrpH\_Drosophila 375 EKLATLYFTVFEGLCKQA-----DSTFKVYVAGLLSSVALIQHATTAE----  
 PheH\_Pseudomonas 155 VFLARLYWMTVFEGLVETD-----QGKRIYGGGILSSPKETVYSLSDE---P  
 PheH\_Chromobacterium 173 PMLARLYWMTVFEGLINTP-----AGMRIYGAGILSSKSGEISYCLDSA---S  
 PheH\_Colwellia 156 VFLARLYWFTVFEGLLDTP-----KGLRIYGGGVLSSPGETDYALNNT---D  
 PheH\_Chloroflexus 149 LELARLYWVSIIEFGLIRED-----ELRAFAGAGLLSSYFGLDHFAPD---T  
 PheH/TrpH\_Dictyostelium 307 QLSTCYWFTVFEGLCKEG-----DTIRAYGAGILSSYFGLQHMKSSK---  
 Pinus 263 WHLTKLYWMTVFEGLTIEEN-----KEVKAFGAGILSSYFGLQHMKSSK---  
 Physcomitrella 286 WHLTKLYWMTVFEGLTIEEN-----NEIKAFGAGLLSSYFGLKHMVGTGDGFM  
 Chlamydomonas 261 WHLTKVYWMTVFEGLVIREG-----DQVKAFGAGILSSYFGLAHMASGA---  
 Chlorella 226 WHLTKLYWMTVFEGLVIREG-----DQVKAFGAGILSSYFGLQHMASGA---

TrpH\_Rattus 349 AKVVPFDPKVACKQECLITSEFQDVFVVSSEFEDAKEKMRFAKTVKRPFGVKVNPYIQSI  
 TyrH\_Rattus 408 PEVRAFDPDITAAVQPYQDQTYQPVYFVSESFNDAKDKLRNYASRIQRPPSVKIDPYTLAI  
 PheH\_Rattus 362 PKLLPLELEKTAQCEYSVTEFQPLYYVAFSFSDAKEKVRTEFAATIPRPPSVRYDPYTORV  
 PheH\_Caenorhabditis 362 PEVDFDPAVCCVTKYPIITEYQPKYFLAESFASAKNKLKSWAATINRPPQIRYNAYTORV  
 TrpH\_Caenorhabditis 339 ATIRFDPRDRVVEQECLITTFQSAFYFTRNFEQAQQLRMFTNNMKRPFIVRYNPYTESV  
 TyrH\_Caenorhabditis 359 PEHKDFDPAVAVQKYEDDDYQPLFYFVADSIHDALAKLRKYASSMDRPPSVVYDPFTKSI  
 PheH\_Drosophila 362 PQLKDFEPESTGVTKYPIITQFQPLYYVAFSFEETAKEKTIKIFANSIPRPPGVRYNAYTQSV  
 TyrH\_Drosophila 415 CEHRAFEPASTAVQPYQDQTYQPLYYVAFSFEEDAKEKFRRWVSTMSRPPSEVRNPNHTERV  
 TrpH\_Drosophila 419 NKIKKDFDPEVTCQCECIITSYQNAYYYTDSFEETAKEQMRFAEESIQRPPGVRYNPYTMSV  
 PheH\_Pseudomonas 199 LH-QAFNPLEAMRTPYRDLIDILQPLFYFVLP---DLKRLFQLAQEDIMALVHEAMRLG---  
 PheH\_Chromobacterium 217 ENRVGFDLMRIMNTRYRDLIDTQKTYFVLDSEFKQLFDATAPDFAPLYLQLADAPWAGADL  
 PheH\_Colwellia 200 VDRKPFIDLVDLRTPYRDLIDIMQPLYYMLTKVSLDLEIRKFEVDDIMELVAQAEALG---  
 PheH\_Chloroflexus 193 ER-VPDFIRRVANTPGAAYSMHETYFILLDLEHVAAILRDYAAAMEGLPVQI-----  
 PheH/TrpH\_Dictyostelium 350 AKKLPFNPEFDACNTEYPIITTFQPLYYVAFSFOKAKEQMRQFADSFKKPFSIRYNPYIQSI  
 Pinus 306 PTFQKLDPAFQALPKMSYKDGQFQNYFLCQSFSDITTEKLRSYARTIHSGN-----  
 Physcomitrella 333 BEFVCLDPEFKMKPKMSYKDGQKRYFLCSFADAAAKLRAYSRSILKFEVQSIKFGDTPIL  
 Chlamydomonas 304 AAERLDPFRPQPRMAYKDGQKRYFVLDSEFAECSELLSSYAAASLG--LPESLRGDASVA  
 Chlorella 269 ARLEPLDVFAPQPKMSYKDGQQRVYFVLDSEFAACADQLKAYCSTLHHAIPGDMRSALGMM

|                         |     |                                                                |
|-------------------------|-----|----------------------------------------------------------------|
| TrpH_Rattus             | 409 | QVLRDSKSTTSAMNELRHLDVNDALARVSRWPSV                             |
| TyrH_Rattus             | 468 | DVLDSPHTQRSLEGVQDELHTLAHALSAIS                                 |
| PheH_Rattus             | 422 | EVL DNTQQKILADSINSEVGI CNALQKIKS                               |
| PheH_Caenorhabditis     | 422 | EILDKVAAQLRLARDIRSEISTEEALGKVNNLKMK                            |
| TrpH_Caenorhabditis     | 399 | EVLNNSRSMMLAVNSLRSEINL AGA HYLL                                |
| TyrH_Caenorhabditis     | 419 | EAL ESSADLEKAFSRLSNLSAETHAADRMKISITM                           |
| PheH_Drosophila         | 422 | EVLDSKPQISNLMDNINSEFQIQNAVAKLRV                                |
| TyrH_Drosophila         | 475 | EVLDSVDKLETLVHQMNTIILHETNAISKLRPF                              |
| TrpH_Drosophila         | 479 | EVL SNAKKTAVVSELRGELSLI CSAARKLSATDENLDVDSIANMLHNSLNVRRGGASGGG |
| PheH_Pseudomonas        | 251 | -----LHAPLFPPKQAA                                              |
| PheH_Chromobacterium    | 277 | APDDLVLNAGDHQGWADT DV                                          |
| PheH_Colwellia          | 256 | -----LHEAKFPVKKAS                                              |
| PheH_Chloroflexus       |     |                                                                |
| PheH/TrpH_Dictyostelium | 410 | EILDNKDKLNICNDLRNQSEIADAI SKLKA                                |
| Pinus                   |     |                                                                |
| Physcomitrella          | 393 | R                                                              |
| Chlamydomonas           | 362 |                                                                |
| Chlorella               | 329 |                                                                |
|                         |     |                                                                |
| TrpH_Rattus             |     |                                                                |
| TyrH_Rattus             |     |                                                                |
| PheH_Rattus             |     |                                                                |
| PheH_Caenorhabditis     |     |                                                                |
| TrpH_Caenorhabditis     |     |                                                                |
| TyrH_Caenorhabditis     |     |                                                                |
| PheH_Drosophila         |     |                                                                |
| TyrH_Drosophila         |     |                                                                |
| TrpH_Drosophila         | 539 | GSPCSPDNSDNSTAEGD                                              |
| PheH_Pseudomonas        |     |                                                                |
| PheH_Chromobacterium    |     |                                                                |
| PheH_Colwellia          |     |                                                                |
| PheH_Chloroflexus       |     |                                                                |
| PheH/TrpH_Dictyostelium |     |                                                                |
| Pinus                   |     |                                                                |
| Physcomitrella          |     |                                                                |
| Chlamydomonas           |     |                                                                |
| Chlorella               |     |                                                                |

**Supplemental Figure 2.** Multiple Sequence Alignment of AAH Proteins from Eukaryotes and Prokaryotes.

Alignments were made with ClustalW; residues were shaded with BoxShade (black for identical, gray for similar). Dashes are gaps introduced to maximize alignment. Arrows mark the positions of two introns common to mammalian phenylalanine (PheH), tyrosine (TyrH), and tryptophan (TrpH) hydroxylases and to *Pinus taeda* and *Physcomitrella patens* AAHs. Green font indicates the predicted targeting signals of the plant proteins, which were removed for bacterial complementation and overexpression experiments. Iron-liganding residues are shaded in red. Full organism names: *Caenorhabditis elegans*, *Chlamydomonas reinhardtii*, *Chlorella* sp. NC64A, *Chloroflexus aurantiacus*, *Chromobacterium violaceum*, *Colwellia psychrerythraea*, *Dictyostelium discoideum*, *Drosophila melanogaster*, *Physcomitrella patens*, *Pinus taeda*, *Pseudomonas aeruginosa*, *Rattus rattus*.

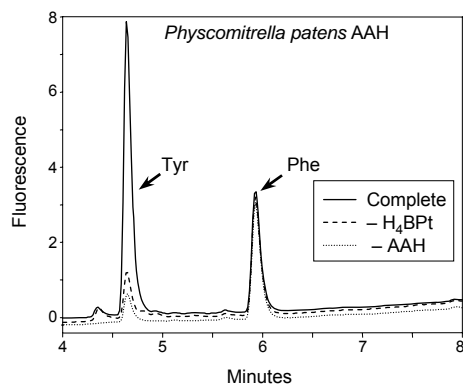

**Supplemental Figure 3.** Phenylalanine Hydroxylase Activity of Recombinant *Physcomitrella patens* AAH.

The complete reaction comprised 1 mM phenylalanine, 0.2 mM H<sub>4</sub>BPt, 50 μM Fe(NH<sub>4</sub>)<sub>2</sub>(SO<sub>4</sub>)<sub>2</sub>, 10 mM dithiothreitol, 40 units of catalase, and extract of *E. coli* cells (10 μg protein) harboring pET28b containing *P. patens* AAH cDNA. Controls were run without H<sub>4</sub>BPt (-H<sub>4</sub>BPt) or with extract from *E. coli* cells harboring pET28b alone (-AAH). Incubation was at 30°C for 15 min. Reactions were analyzed by fluorometric HPLC.

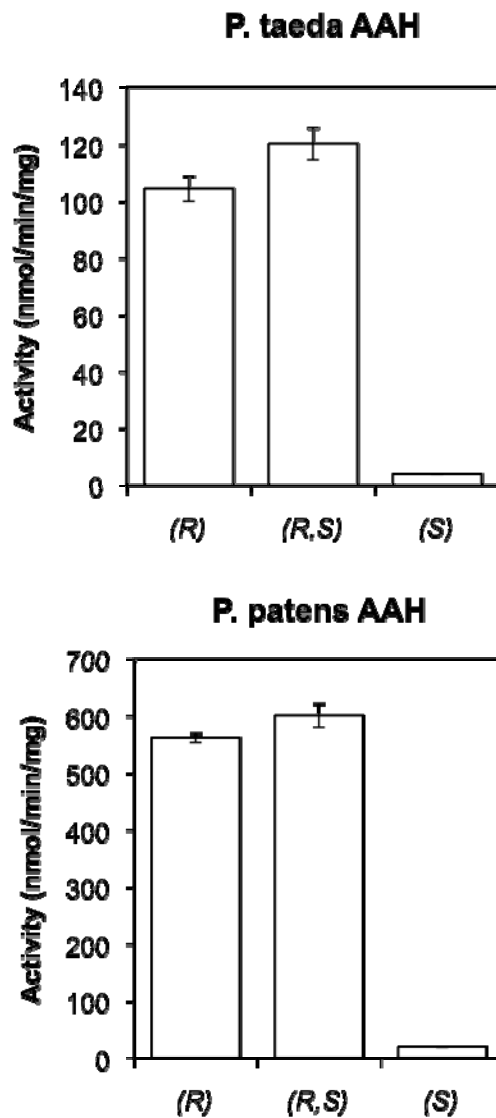

**Supplemental Figure 4.** Effect of H<sub>4</sub>BPt Chirality on Phenylalanine Hydroxylase Activity.

Activities of recombinant AAHs from *P. taeda* and *P. patens* with the natural (*R*) and unnatural (*S*) forms of H<sub>4</sub>BPt, and a racemic mixture (*R,S*). Cofactor concentrations ( $\mu$  M) were: *P. taeda*, 200; *P. patens*, 100. Activity was assayed as in Figure 5. Data are means and SE of three replicates.

**A**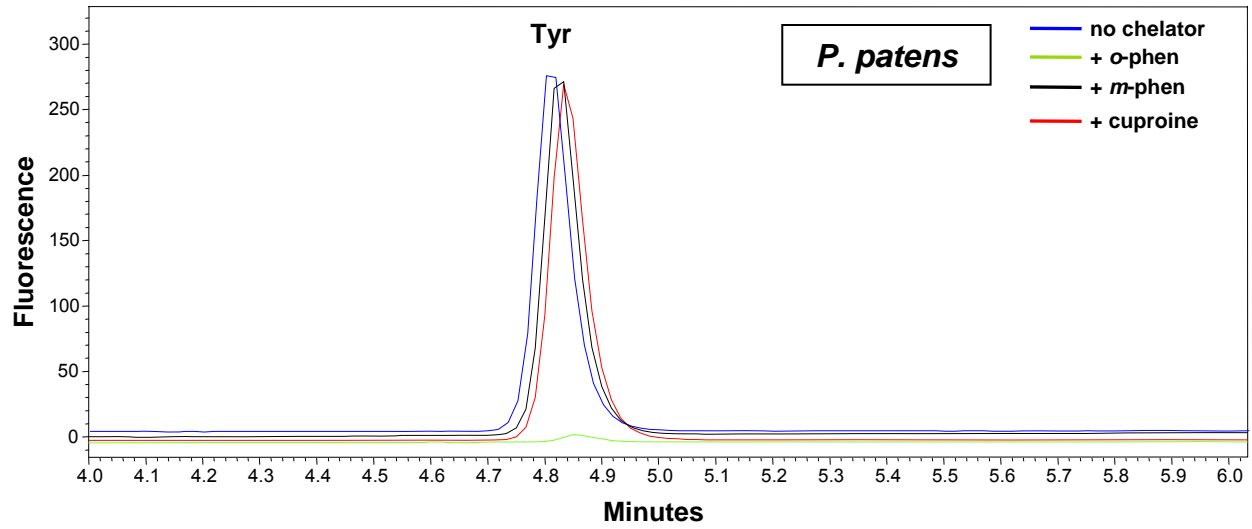**B**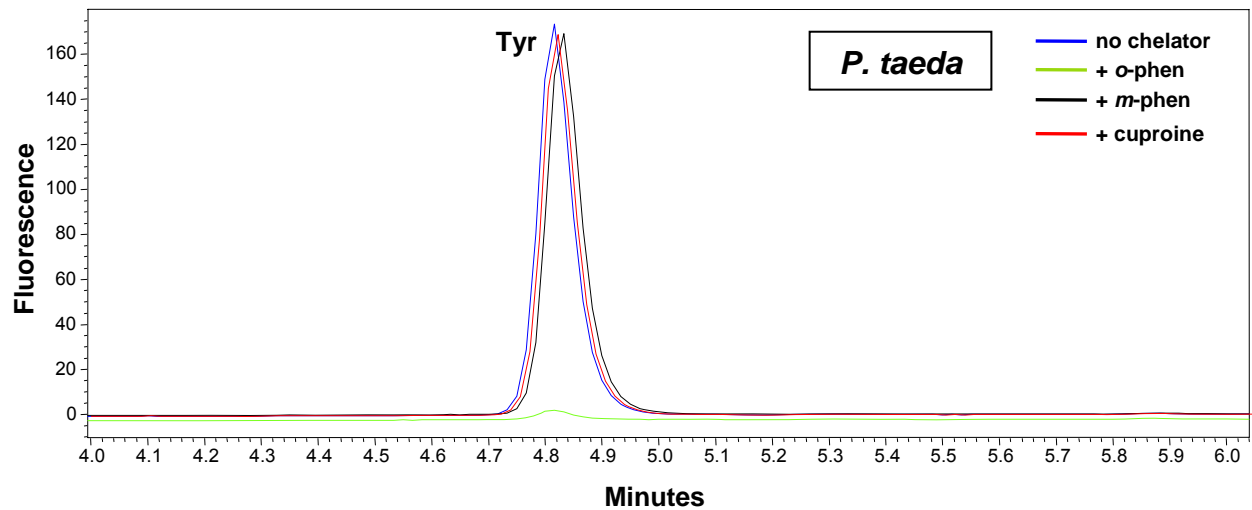**Supplemental Figure 5. Evidence That Phenylalanine Hydroxylase Activity Requires Iron.**

Fluorometric analysis of phenylalanine hydroxylase activity of recombinant *P. patens* (A) and *P. taeda* AAH (B). Reactions contained 50  $\mu$ M chelator (*o*-phen, *o*-phenanthroline; *m*-phen, *m*-phenanthroline; cuproine, bathocuproine) or no chelator. Cofactor concentration was 200  $\mu$ M.



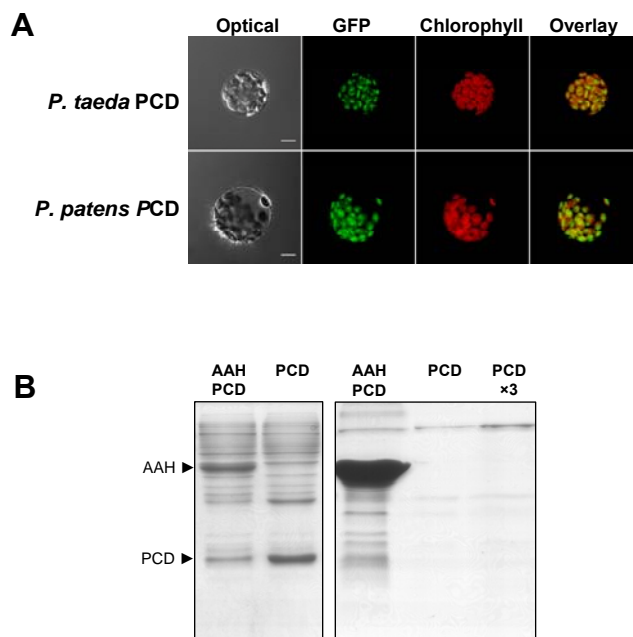

**Supplemental Figure 6.** Evidence That *P. taeda* and *P. patens* PCD Proteins Are Chloroplast-Targeted and That *P. taeda* PCD and AAH Form a Complex In Vitro.

**(A)** Transient expression in *Arabidopsis* mesophyll protoplasts of green fluorescent protein (GFP) fused to the C terminus of *P. taeda* PCD (upper panels) or *P. patens* PCD (lower panels). The fusion constructs were as described previously (Naponelli et al., 2008). GFP (green pseudo-color) and chlorophyll (red pseudo-color) fluorescence were observed by confocal microscopy. Bars = 10  $\mu$ m.

**(B)** Complex formation between PCD and AAH. *P. taeda* PCD was expressed in *E. coli* together with *P. taeda* AAH, or alone as a control. The left panel shows SDS-PAGE separations of whole cell protein extracts (10  $\mu$ g per lane) stained with Coomassie blue. The extracts were applied to Ni-affinity columns, which were washed exhaustively with buffer containing 50 mM imidazole, and then eluted with buffer containing 250 mM imidazole. The right panel shows separations of equivalent amounts of eluate from each sample, plus a three-fold higher loading of the PCD-alone control extract, stained with silver. Note that a PCD band is present only in the sample also containing AAH.

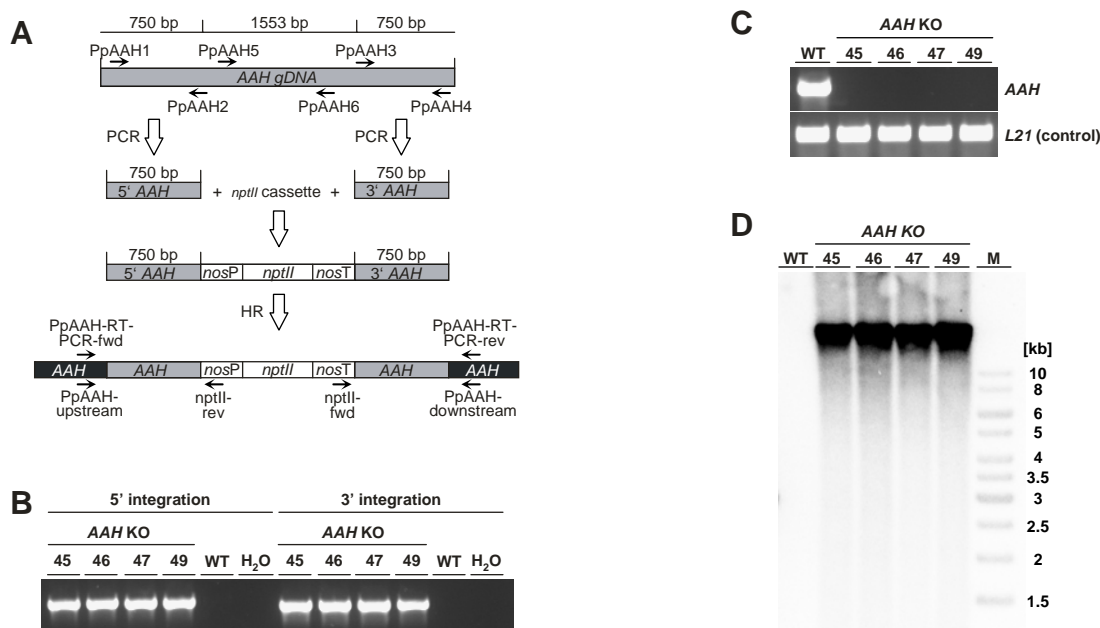

### Supplemental Figure 7. Generation and Quality Controls for Four Independent *P. patens* *AAH* Knockout Lines.

**(A)** Schematic illustration of *AAH* knockout generation. Upper: 750-bp fragments corresponding to the 5'- and 3'-flanking regions of *AAH* were amplified with the primers PpAAH1 and PpAAH2, and PpAAH3 and PpAAH4. The *AAH* knockout construct was generated by successive cloning of an *nptII* selection marker cassette in between the *AAH* 5'- and 3'-flanking sequences. Bottom: Expected genomic structure of the *AAH* locus after integration of the *AAH* knockout construct by homologous recombination (HR). Arrows indicate primers used for molecular analysis of the transgenic lines. White box: *nptII* cassette; grey boxes: *AAH* gDNA fragments; black boxes: genomic *AAH* locus.

**(B)** PCR analysis with genomic DNA from four transgenic lines (*AAH* KO 45-49) and wild type (WT) to confirm 5' (PpAAH-upstream/*nptII*-rev primers) and 3' (PpAAH-down-stream/*nptII*-fwd primers) integration of the *AAH* knockout construct. H<sub>2</sub>O: PCR water control without DNA.

**(C)** RT-PCR from four *AAH* KO and wild type (WT) with PpAAH-RT-PCR-fwd/PpAAH-RT-PCR-rev primers spanning the integrated *AAH* knockout construct and primers for the *L21* control to monitor efficient cDNA synthesis. *AAH* and *L21* reactions were performed in parallel.

**(D)** Southern blot with genomic DNA from four *AAH* KO mutants and wild type digested with *BsmI*, which does not cut within the knockout construct. An *nptII* fragment was used as hybridization probe. The blot does not show the predicted 4.5-kb band, but a shifted band due to the concatameric integration of knockout constructs, which is common in *P. patens*.; M: Molecular weight markers.

Sequences of primers used for molecular analyses are listed in Supplemental Table 2 online.

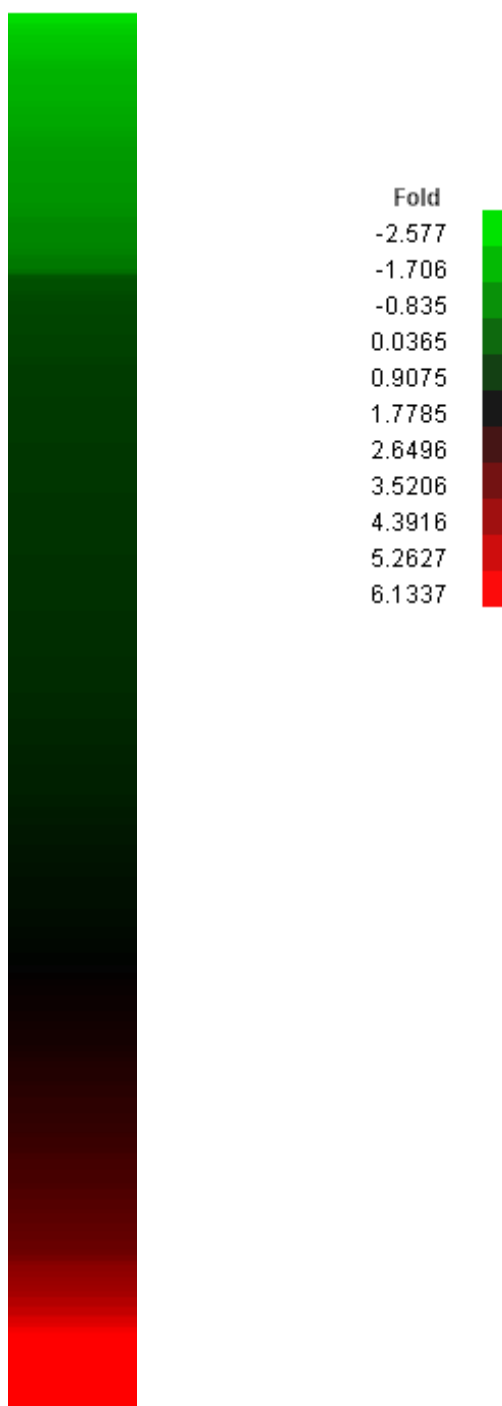

**Supplemental Figure 8.** Heat Map Depicting the Changes in Metabolite Levels that Characterize *P. patens* AAH Knockout Lines.

Signal intensities for each metabolite were scaled to an internal control and then  $\log_2$  transformed; values were subjected to a mixed model ANOVA with lines as a fixed effect. Contrasts (i.e., fold difference) between knockout and wild-type lines are presented, with green indicating compounds downregulated in the knockout lines and red indicating compounds upregulated in the knockout lines. There are a total of 425 polar and nonpolar metabolites that are shown after being declared significant, with q-values (reflecting the false discovery rate) ranging from 0.0495 to 0.0021.

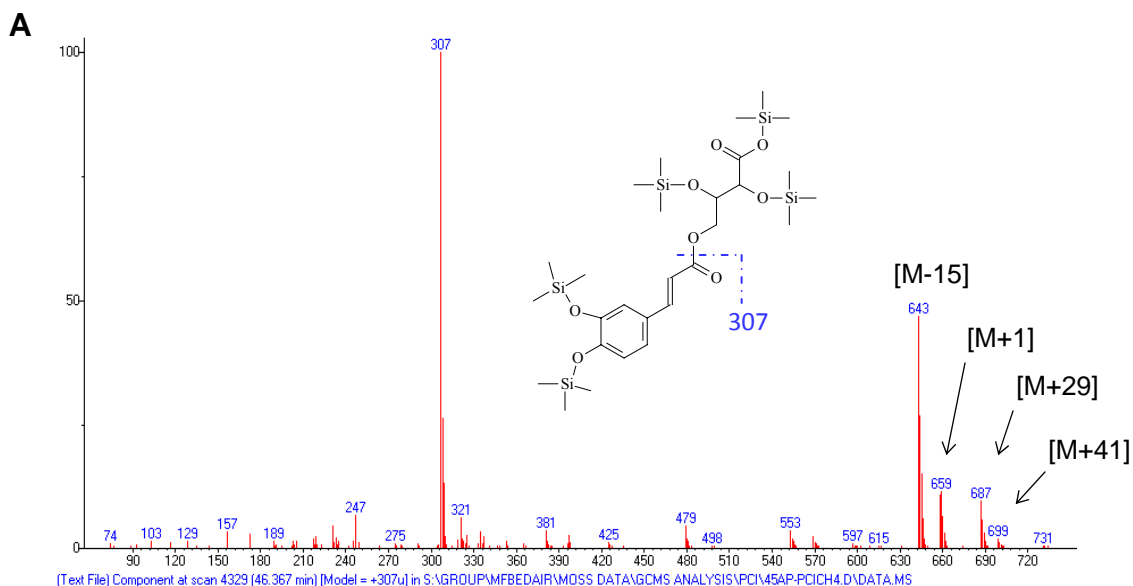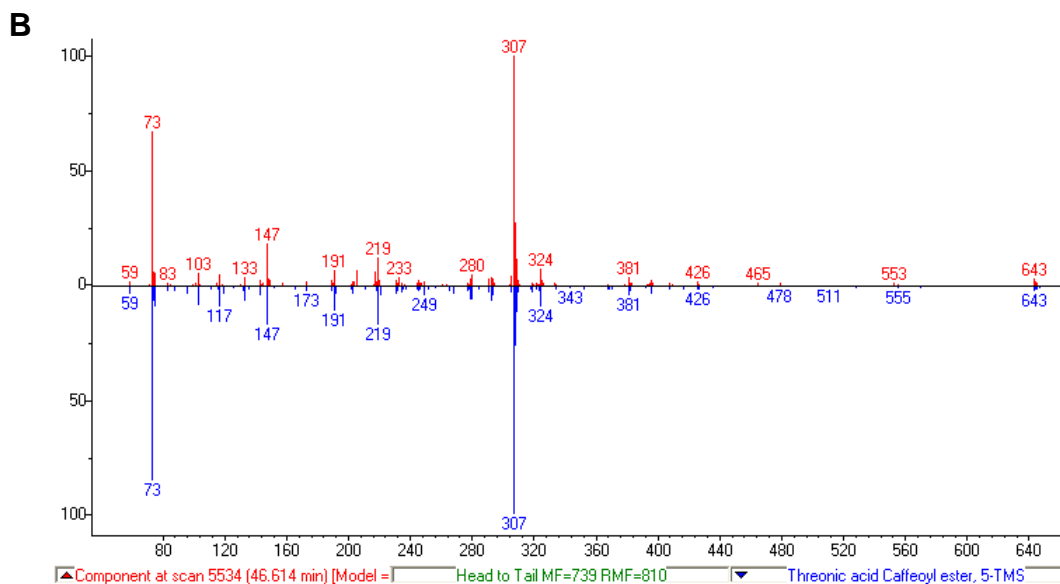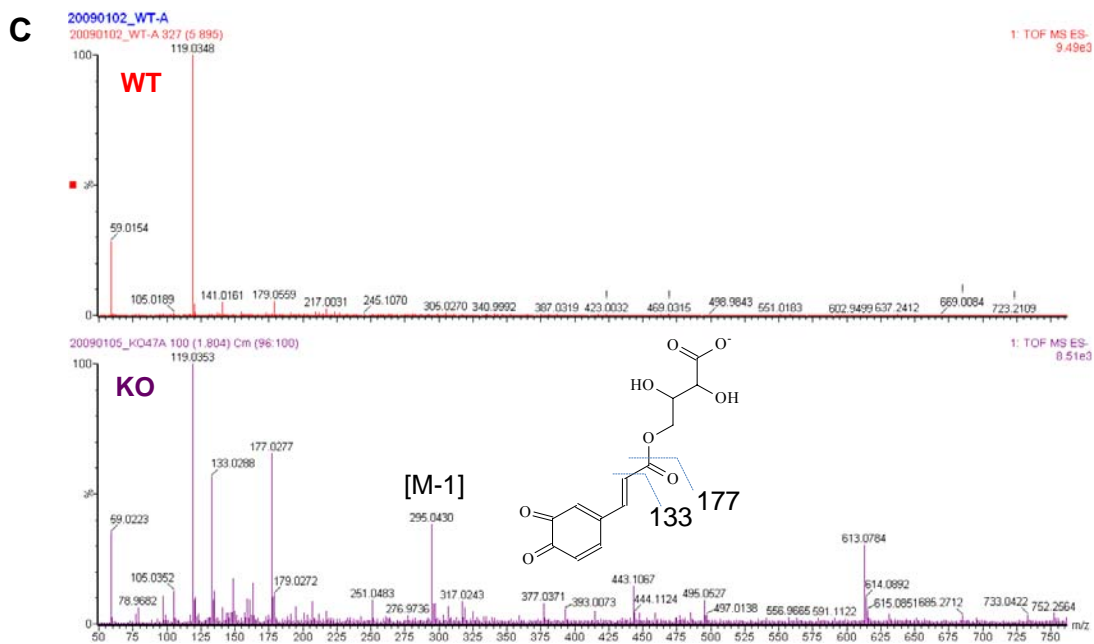

**Supplemental Figure 9.** Mass Spectral Evidence for the Identity of Caffeic Acid Esters in *P. patens*.

**(A)** Chemical ionization spectra of caffeoyl ester at 46.62 min using methane as reagent gas. Molecular ions peaks  $[M+1]^+$ ,  $[M+29]^+$  and  $[M+41]^+$  are the  $[M+H]^+$ ,  $[M+C_2H_5]^+$ , and  $[M+C_3H_5]^+$  respectively. The ion  $[M-15]^+$  is the  $[M-CH_3]^+$ .

**(B)** Electron ionization spectra of caffeoyl ester at 46.62 min in AAH knockout (KO) (red) and of synthesized caffeoylthreonic acid standard (blue).

**(C)** Liquid chromatography quadrupole time of flight (LC-Q-TOF) MS evidence for the presence of caffeoylthreonic acid in the AAH KO. Ion  $[M-1]^-$  is the  $[M-H]^-$ .

Three unknown peaks at 46.04, 46.62 and 47.76 min were found to be four- to five-fold higher in the AAH KO compared to the wild-type (WT). The first peak at 46.04 min was weakly identified as 1-trans-caffeoylquinic acid, but this identification was dismissed due to the lower retention index value of the unknown peak. However, the presence of the characteristic caffeoyl ester ions at  $m/z$  307 and 324 and the highest Pearson correlation coefficient with caffeic acid (0.9835 and 0.9788,  $p < 0.0001$ ) suggested that these two peaks are esters of caffeic acid with a smaller ester moiety than the C7 quinic acid. The unknown caffeoyl esters were analyzed with chemical ionization using methane as reagent gas; the molecular ion peaks were  $m/z$  659, 687 and 699, i.e.,  $M+H$ ,  $M+C_2H_5$  and  $M+C_3H_5$ , respectively (Supplemental Figure 9A). Thus the nominal mass of the trimethylsilyl derivative of the two caffeoyl esters was found to be 658. The isotopic ratio of the molecular ion peak suggested the presence of five trimethylsilyl groups, thus indicating a nominal mass of 298 for the underivatized molecules. Searching the plant database KNApSAcK (<http://kanaya.naist.jp/KNApSAcK/>) suggested three possibilities: caffeoyltrihydroxybutyric acid, caffeoyldexoyribitol or caffeoylmethylerythritol. Analyzing AAH KO and WT samples using Q-TOF UPLC-MS showed the presence of two peaks that eluted at 1.4 and 1.7 min and were three-fold higher in the KO (Supplemental Figure 9C). The accurate masses of these peaks were within 5 ppm of the exact mass of caffeoyltrihydroxybutyric acid but within 120 ppm of the other two possibilities, the dexoyribitol or methylerythritol esters of caffeic acid. The identification of the unknown caffeoyl ester peaks as caffeoyltrihydroxybutyric acid was further confirmed by synthesis of caffeoylthreonic acid. The GCMS analysis of the synthesized caffeoylthreonic acid matched the peak at 46.62 min as can be seen from Supplemental Figure 9B and was within a retention index difference of 15.

**Supplemental Table 1.** Separation and Detection of Potential Products of AAH Action Using Fluorometric HPLC

| Substrates <sup>a</sup> |                          | Potential products             |             | Fluorescence wavelengths <sup>b</sup><br>(nm) | Minimum detectable product formation |                                       |                                        |
|-------------------------|--------------------------|--------------------------------|-------------|-----------------------------------------------|--------------------------------------|---------------------------------------|----------------------------------------|
| Name                    | RT <sup>c</sup><br>(min) | Name                           | RT<br>(min) |                                               | pmol per assay                       | % of <i>P. taeda</i> Phe <sup>d</sup> | % of <i>P. patens</i> Phe <sup>e</sup> |
| L-Phenylalanine         | 6.03                     | L-Tyrosine                     | 4.71        | 265/315                                       | 0.5                                  | 0.06                                  | 0.02                                   |
| D-Phenylalanine         | 6.05                     | D-Tyrosine                     | 4.73        | 265/315                                       | 0.5                                  | 0.06                                  | 0.02                                   |
| L-Tyrosine              | 4.98                     | L-3,4-Dihydroxyphenylalanine   | 4.05        | 265/315                                       | 0.6                                  | 0.08                                  | 0.03                                   |
| L-Tryptophan            | 8.15                     | L-5-Hydroxytryptophan          | 6.27        | 265/315                                       | 0.2                                  | 0.03                                  | 0.01                                   |
| Cinnamate               | 18.00                    | <i>p</i> -Coumarate            | 13.40       | 310/375                                       | 13                                   | 0.56                                  | 0.41                                   |
| <i>p</i> -Coumarate     | 13.40                    | Caffeate                       | 11.40       | 310/375                                       | 26                                   | 1.00                                  | 0.28                                   |
| Benzoate                | 14.60                    | 4-Hydroxybenzoate              | 10.50       | 250/330                                       | 4                                    | 0.51                                  | 0.13                                   |
| Anthranilate            | 12.94                    | 3-Hydroxyanthranilate          | 8.60        | 315/400                                       | 2                                    | 0.25                                  | 0.06                                   |
| Mandelate               | 7.52                     | 4-Hydroxymandelate             | 4.40        | 250/330                                       | 17                                   | 0.74                                  | 0.19                                   |
| Indoleacetate           | 15.16                    | 5-Hydroxyindoleacetate         | 9.94        | 280/350                                       | 0.2                                  | 0.003                                 | 0.0003                                 |
| Caffeate                | 11.40                    | 5-Hydroxycaffeate <sup>f</sup> | <11.40      | 310/375                                       | 26                                   | 0.40                                  | 0.04                                   |
| Ferulate                | 13.98                    | 5-Hydroxyferulate <sup>f</sup> | <13.98      | 310/375                                       | 9                                    | 0.14                                  | 0.02                                   |

<sup>a</sup>Substrate concentration was 15 mM for indoleacetate, caffeate, and ferulate, 1 mM in other cases. L-Phenylalanine was tested at both 15 and 1 mM.

<sup>b</sup>Excitation/emission.

<sup>c</sup>RT, retention time. Gradient 1 was used with phenylalanine, tyrosine, and tryptophan substrates; gradient 2 was used with all other substrates.

<sup>d</sup>Minimum detectable product formation expressed as a percentage of that formed by *P. taeda* AAH with the same concentration of L-phenylalanine as substrate (1 or 15 mM) and the same amount of protein per assay (2.9–8.6 µg). Activities with 1 and 15 mM L-phenylalanine were 27 and 75.5 nmol min<sup>-1</sup> mg<sup>-1</sup> protein, respectively.

<sup>e</sup>Minimum detectable product formation expressed as a percentage of that formed by *P. patens* AAH with the same concentration of L-phenylalanine as substrate (1 or 15 mM) and the same amount of protein per assay (2.8–7.7 µg). Activities with 1 and 15 mM L-phenylalanine were 107 and 690 nmol min<sup>-1</sup> mg<sup>-1</sup> protein, respectively.

<sup>f</sup>Authentic standards not available; fluorescence excitation and emission wavelengths and detection limit based on the substrate.

**Supplemental Table 2. Primers Used in this Study**

| Primer function and primer name              | Primer direction <sup>a</sup> | Primer sequence (5'→3') <sup>b</sup>           |
|----------------------------------------------|-------------------------------|------------------------------------------------|
| <b><i>Pinus taeda</i> cDNA cloning</b>       |                               |                                                |
| PtAAH-GSP1                                   | R                             | CAGTATGCCAGCTCCAAATGCCTTAAC                    |
| PtAAH-GSP2                                   | R                             | GAGCAAGATCAGCAAACCTCAGGGTGTAC                  |
| PtAAH-GSP3                                   | F                             | GTACACCCTGAGTTTGTCTGATCTTGCTC                  |
| PtAAH-GSP4                                   | F                             | GTAAAGGCATTTGGAGCTGGCATACTG                    |
| PtAAH7                                       | R                             | TGTGTTCTTGGCCAGGTCAGCA                         |
| PtAAH8                                       | R                             | TTCTCTTGTATTCTTCATCATGGTATCC                   |
| pSL1                                         | F                             | GCTTAAGGTGCACGGCCCA                            |
| pSL2                                         | R                             | AAAACGACGGCCAGTGCCAAG                          |
| <b><i>Subcellular localization</i></b>       |                               |                                                |
| PpAAH-GFP-fwd                                | F                             | ATGATCGTCGACATGGCTATGGAAGTGGGTATC              |
| PpAAH-GFP-rev                                | R                             | CACCATGGTGAGCCGGATTGGCGTATC                    |
| PtAAH-4z-fwd                                 | F                             | CAGTCAGAAATTCACCATGGCGTTTCCACTCCAG             |
| PtAAH-4z-rev                                 | R                             | CAGTCACTGCAGTTAATTACCAGAGTGAATAGTTC            |
| PpAAH-4z-fwd                                 | F                             | CAGTCAGAAATTCACCATGGCTATGGAAGTGGGTATC          |
| PpAAH-4z-rev                                 | R                             | CAGTCACTGCAGTTAGAGCCGGATTGGCGTATC              |
| <b><i>Recombinant protein expression</i></b> |                               |                                                |
| PtAAH-expfwd                                 | F                             | CAGTCAACCATGGAACACCCAAGAGTGAGCAG               |
| PtAAH-exprev                                 | R                             | GATGCTCTCGAGATTACCAGAGTGAATAGTTCTTGCATA        |
| PpAAH-expfwd                                 | F                             | CAGTCAACCATGGA AAAAGGAGAGAGAGGCAGA             |
| PpAAH-exprev                                 | R                             | CAGTCACTCGAGGAGCCGGATTGGCGTATCT                |
| <b><i>Complex formation</i></b>              |                               |                                                |
| PtPCD-pet43fwd                               | F                             | GGGAATTCATATGAAATGTTCTCAAGCTAATG               |
| PtPCD-pet43rev                               | R                             | AGCTGAATTCCTTAGTTCTTTGCAGCTTTC                 |
| PtPCD-rbsfwd                                 | F                             | CAGTCATCTAGAAATAATTTGTTAACTTTAAG               |
| PtPCD-rbsrev                                 | R                             | CAGTCATCTAGATTAGTTCTTTGCAGCTTTCTTTC            |
| <b><i>Functionnal complementation</i></b>    |                               |                                                |
| PaAAH-pSU18fwd                               | F                             | CATGGAATTCCTGAAGGAAACAGCTATGAAAACGACGCAGTACGTG |
| PaAAH-pSU18rev                               | R                             | ACGTACGCATGCTCAGGCCCGCTGCTTGGG                 |
| PtAAH-pSU18fwd                               | F                             | CATGGAATTCCTGAAGGAAACAGCTATGGAACACCCAAGAGTGA   |
| PtAAH-pSU18rev                               | R                             | ACGTACGCATGCTTAATTACCAGAGTGAATAGTTCTT          |
| PpAAH-pSU18fwd                               | F                             | CATGGAATTCCTGAAGGAAACAGCTATGAAGGAGAGAGGCAGACAA |
| PpAAH-pSU18rev                               | R                             | ACGTACGCATGCTTAGAGCCGGATTGGCGTAT               |
| CrAAH-pSU18fwd                               | F                             | CATGGAATTCCTGAAGGAAACAGCTATGTCGACGGCTCTGACGC   |
| CrAAH-pSU18rev                               | R                             | ACGTACGCATGCTCACGCCACGCTGGCGTC                 |
| <b><i>Moss Knockout</i></b>                  |                               |                                                |
| PpAAH1                                       | F                             | ACGTGGTACCATCCTTAAATGGGGATTGTGCG               |
| PpAAH2                                       | R                             | TCAAGCTTGCGGCCGCATACTCACCACAATACAAACTTTC       |
| NPT1                                         | F                             | GTGAGTATGCGGCCGCAAGCTTGATATCGGATCCTGT          |
| NPT2                                         | R                             | ATTATCACTCGAGGGATCCCCGGGCTG                    |
| PpAAH3                                       | F                             | GGATCCCTCGAGTGAATAATACAGGAGCAGAAATC            |
| PpAAH4                                       | R                             | TAATGAGCTCCTTTAATCTCGTTACCTTCCTTA              |
| PpAAH5                                       | F                             | CCTATTCCCAGTAGCATCCACG                         |
| PpAAH6                                       | R                             | GATCATGGTAGCCCTGCAAAAAG                        |
| PpAAH-upstream                               | F                             | ATGCCATGTGCATTGTATCC                           |
| nptII-rev                                    | R                             | CCAAACGTA AAAACGGCTTGT                         |
| PpAAH-downstream                             | R                             | GCTTCAGTCCCCAAAATA                             |
| nptII-fwd                                    | F                             | AGCGCGAAACTAGGATAAA                            |
| PpAAH-RT-PCR-fwd                             | F                             | CCCTGTGTCTCGTCAAGGAT                           |
| PpAAH-RT-PCR-rev                             | R                             | TGTAGCTCATCTTGGGCATCT                          |
| PpL21-fwd                                    | F                             | GGTTGGTCATGGGTTGCG                             |
| PpL21-rev                                    | R                             | GAGGTCAACTGTCTCGCC                             |

<sup>a</sup> F, forward; R, reverse.<sup>b</sup> Restriction sites are underlined.

## SUPPLEMENTAL METHODS

### AAH Ablation in Moss

The knockout construct was designed to remove part of the AAH genomic sequence (*AAH*) and to replace it with the *nptII* selection marker. To avoid polar effects, the deleted region stretched from the second exon of *AAH* to the middle of its last exon, representing about half the coding sequence. The construct was assembled in pBluescript II SK (Stratagene) by inserting on each side of the *nptII* cassette a 750-bp fragment homologous to the 5' or 3' flanking region of the planned deletion (see Supplemental Figure 7A online). These fragments were amplified by PCR from *P. patens* genomic DNA with primers PpAAH1/AAH2, and PpAAH3/AAH4, respectively (see Supplemental Table 2 online) and subcloned into pGEM-T (Promega). When internal pGEM-T restriction sites were needed for further cloning purposes, fragments were given the desired orientation by excising the insert with *NotI*, religating the fragments, and selecting the correct orientation by restriction. The construct was assembled stepwise as follows. First, the *nptII* selection marker cassette (*nos*-promoter: neomycin phosphotransferase: *nos*-terminator) amplified from the vector pBSNNEV (Egener et al., 2002) with primers NPT1/NPT2 was cloned into the *XhoI* and *NotI* sites of pBluescript II SK. The *nptII* gene having *BamHI* sites at its extremities was given the same orientation as the *AAH* gene on the chromosome by excising the gene with *BamHI*, religating the fragments, and selecting the correct orientation by restriction. Secondly, the 3' flanking region of *AAH* was subcloned into pBluescript II SK using an internal *NotI* site from pGEM-T and the *SacI* site from the primer PpAAH4. Thirdly, the 5' flanking region having a *KpnI* site from the primer PpAAH1 and an internal *ApaI* site from pGEM-T was inserted into pBluescript II SK (*ApaI* brought in the vector by the *nptII* fragment). The whole construct was verified by sequencing. The vector backbone and the insert having the same size, the construct was codigested by *ApaI* (cutting twice the vector), *KpnI*, and *SacI* to generate a single 3 kb fragment used for the recombination. This fragment (knockout construct) was purified and transfected into *P. patens* protoplasts. Protoplast isolation, polyethylene glycol-mediated transfection, and regeneration of stably transformed plants were performed according to standard procedures (Frank et al., 2005). Plants were selected on standard growth medium containing 12.5 mg/L G418. G418-resistant transgenic lines were screened by PCR to identify lines with a disrupted *AAH* locus with the primers PpAAH5 and PpAAH6 derived from the 1.5 kb *AAH* region that was replaced by the *nptII* cassette. A PCR amplicon was obtained from wild type



genomic DNA; transformants that did not give rise to an amplicon were considered to have undergone targeted integration of the knockout construct at the *AAH* locus.

Four independent transgenic lines were selected to confirm precise 5' and 3' integration of the construct by PCR with primers located up- or downstream of the expected integration site and primers derived from regions of the *nptII* selection marker cassette (PpAAH-upstream/*nptII*-fwd and PpAAH-downstream/*nptII*-fwd, respectively; see Supplemental Figure 7B online). All four lines showed precise 5' and 3' integration of the knockout construct at the *AAH* locus. These lines are null mutants since they failed to generate an *AAH*-derived PCR product in a subsequent RT-PCR using the primers PpAAH-RT-PCR-fwd and PpAAH-RT-PCR-rev spanning the integrated *AAH* knockout construct (see Supplemental Figure 7C online). cDNA was synthesized from 2 µg of total RNA with an oligo(dT) primer using 200 units of SuperScriptIII Reverse Transcriptase (Invitrogen) according to the manufacturer's instructions in a total volume of 20 µl. RT-PCR with 35 cycles was performed using 1.3 µl of the synthesized cDNA with primers PpAAH-RT-PCR-fwd and PpAAH-RT-PCR-rev spanning the integrated PpAAH knockout construct. Sequences of all primers and RT-PCR primers for the *P. patens* *L21* control gene encoding a small ribosomal protein are reported in Supplemental Table 2 online. Genomic Southern blot analyses were performed to exclude additional integrations of the knockout construct into the nuclear DNA. Two µg of genomic DNA of knockout and wild type plants were digested with *BsmI* (which does not cut within the knockout construct), separated on a 0.8% agarose gel, blotted onto nylon membrane, and hybridized with a radiolabeled *nptII* cassette DNA fragment. The resulting hybridization pattern demonstrates an insertion of concatemeric knockout cassettes (Kamisugi et al., 2006) at the *AAH* locus in all four analyzed knockout mutants, but no illegitimate integrations at other loci (see Supplemental Figure 7D online). These lines were used for further analyses.

*P. patens* was grown axenically either in liquid or solid Knop medium containing 250 mg/L KH<sub>2</sub>PO<sub>4</sub>, 250 mg/L MgSO<sub>4</sub>·7 H<sub>2</sub>O, 250 mg/L KCl, 1 g/L Ca(NO<sub>3</sub>)<sub>2</sub>·4 H<sub>2</sub>O, 12.5 mg/L FeSO<sub>4</sub>·7 H<sub>2</sub>O, pH 5.8; solid medium was supplemented with 1% (w/v) agar. The plants were cultured under standard conditions in a growth chamber at 25 ± 1°C under a 16 h/8 h light/dark regime with a light intensity of 55 µmol m<sup>-2</sup> s<sup>-1</sup>. Plants grown in liquid culture were subcultured weekly; plants grown on solid medium were transferred to fresh medium monthly. For metabolic analyses, 1.5 g batches of plant material were grown in 450 mL liquid medium under standard

conditions, harvested by filtration, and freeze-dried in glass vials for 48 h. The samples were then shipped on dry ice to the Samuel Roberts Noble Foundation for metabolomic analysis.

### **Metabolomic Analysis**

For GC-MS analysis, lyophilized samples were ground and  $6.00 \pm 0.05$  mg was weighed into a 4 mL glass vial. Samples were extracted with methanol and chloroform (1:1.5, v/v) containing docosanol (non-polar internal standard, 10  $\mu\text{g/mL}$ ) for 1 h at 50°C, with agitation (200 rpm). Water (1.5 mL) containing 25  $\mu\text{g/mL}$  ribitol (polar internal standard) was added and samples were incubated for a second 1 h period. The biphasic system was then centrifuged at 2900 *g* for 30 min. Two mL of the aqueous polar phase and 1 mL of the non-polar phase were transferred to individual 2 mL glass vials. Polar extracts were dried in a vacuum centrifuge, and the non-polar extracts were dried under a stream of nitrogen gas. Dried polar extracts were methoximated in pyridine with 50  $\mu\text{L}$  of freshly prepared methoxyamine-HCl (15 mg/mL), briefly sonicated, and incubated at 50°C until the residue was resuspended. Metabolites were then derivatized by adding 50  $\mu\text{L}$  of a commercial derivatization solution (Pierce Biotechnology) containing *N*-methyl-*N*-trimethylsilyltrifluoroacetamide (MSTFA) + 1% trimethylchlorosilane (TMCS) and incubating for 1 h at 50°C. The sample was cooled to room temperature, transferred to a 300  $\mu\text{L}$  glass insert, and analyzed using an Agilent 6890 GC coupled to a 5973i MSD scanning from *m/z* 50-650 with the acquisition rate of 2 spectra/s. Samples (1  $\mu\text{L}$ ) were injected at a 15:1 split ratio and injector was held at 280°C. Separation was achieved on DB-5MS column (J&W Scientific, 60 m, 0.25 mm i.d., and 0.25  $\mu\text{m}$  film) at 1 mL/min helium. The temperature program was 2 min at 80°C followed by a 47 min ramp to 315°C and was held at 315°C for 12 min. The transfer line to the mass spectrometer was set to 280°C and the MS source was set to 200°C. Chemical ionization of the polar fraction was done using methane as the reactant gas and positive ion detection; 1  $\mu\text{L}$  was injected in a splitless mode and MSD scanning was from *m/z* 50-800.

The dried non-polar extract was resuspended in 0.5 mL chloroform and transesterified by adding 0.5 mL 1.25 M HCl in methanol and incubating for 6 h at 50°C. Following transesterification, HCl and solvent were evaporated under nitrogen until dryness, then resuspended in 70  $\mu\text{L}$  pyridine and derivatized with 30  $\mu\text{L}$  of MSTFA + 1% TMCS for 1 h at 50°C. The sample was cooled to room temperature, transferred to a 300  $\mu\text{L}$  glass insert and analyzed using the parameters described above for the EI-MS polar extracts (Broeckling et al., 2005). AMDIS software (<http://chemdata.nist.gov/mass-spc/amdis/>) was used for mass spectra deconvolution and meta-

bolite identification by searching several EI-MS libraries including an in-house build library, the published GOLM library ([http://csbdb.mpimp-golm.mpg.de/csbdb/gmd/msri/gmd\\_msri.html](http://csbdb.mpimp-golm.mpg.de/csbdb/gmd/msri/gmd_msri.html)) and the commercial NIST08 library. MET-IDEA software (<http://bioinfo.noble.org/download>) was used for peak picking, alignment and quantification. The relative peak areas of metabolites were normalized against the peak areas of the internal standard. Normalization allows quantitative comparisons of accumulated metabolites or tentative peaks. After normalization, peak areas were  $\log_2$ -transformed. Metabolite abundance was contrasted between genotypes by running a mixed-model ANOVA (PROC MIXED) with lines as fixed effects. In order to generate a conservative estimate of significantly different metabolite quantities, contrasts were declared significant after adjustment for multiple testing using a false discovery rate (FDR) of 5% (Benjamini and Hochberg, 1995). The analysis was carried out using PROC MIXED in SAS 9.1 software (SAS Institute). FDR was calculated using R (R Foundation for Statistical Computing). Multi-Experiment Viewer software (Saeed et al., 2003) was used for hierarchical clustering analysis.

Quantification of selected metabolites was done using three knockout lines and three wild type samples. Standard calibration curves were constructed for phenylalanine, caffeic acid, and chlorogenic acid (used to quantify unknown caffeic esters). Ions  $m/z$  218, 396, and 307 were used for the quantification of phenylalanine, caffeic acid, and caffeic esters, respectively. Caffeoylthreonic acid was synthesized using Steglich esterification (Neises and Steglich, 1978).

For LC-MS analysis, lyophilized samples were ground and  $10.00 \pm 0.05$  mg was weighed into a 4 mL glass vial. Samples were extracted in 1 mL of 80% (v/v) aqueous methanol containing 18  $\mu\text{g/mL}$  umbelliferone as an internal standard for 2 h at room temperature. Samples were centrifuged and the supernatant analyzed by Waters ACQUITY<sup>TM</sup> UPLC/ QTOF Premier<sup>TM</sup> MS. Separations were achieved using a Waters ACQUITY<sup>TM</sup> UPLC 2.1 x 100 mm, BEH C18 column maintained at 60°C. The mobile phase consisted of (A) 0.1% (v/v) aqueous acetic acid and (B) acetonitrile and a linear gradient of 95%:5% to 30%:70% eluents A:B over 30 min with a flow rate of 0.56 mL/min. Mass spectrometry was operated in negative ion electrospray. The nebulization gas was 850 L/h at 350°C, cone gas was 50 L/h and the source temperature was 120°C. TOF data were acquired from  $m/z$  100-2000 using lock-mass ion at an interval of 10 s. Raffinose was used as the reference compound and delivered at a concentration of 50 fmol/mL and flow rate of 0.2 mL/h. Peak picking, alignment and quantification were performed using MarkerLynx software (Waters).

## REFERENCES

- Benjamini, Y., and Hochberg, Y.** (1995). Controlling the false discovery rate – a practical and powerful approach to multiple testing. *J. R. Stat. Soc. Ser. B. Methodol.* **57**: 289-300.
- Broeckling, C.D., Huhman, D.V., Farag, M.A., Smith, J.T., May, G.D, Mendes, P., Dixon, R.A., and Sumner, L.W.** (2005). Metabolic profiling of *Medicago truncatula* cell cultures reveals the effects of biotic and abiotic elicitors on metabolism. *J. Exp. Bot.* **56**: 323-336.
- Egener, T., Granado, J., Guitton, M.C., Hohe, A., Holtorf, H., Lucht, J.M., Rensing, S.A., Schlink, K., Schulte, J., Schween, G., Zimmermann, S., Duwenig, E., Rak, B., and Reski, R.** (2002). High frequency of phenotypic deviations in *Physcomitrella patens* plants transformed with a gene-disruption library. *BMC Plant Biol.* **2**: 6.
- Frank, W., Decker, E.L., and Reski, R.** (2005). Molecular tools to study *Physcomitrella patens*. *Plant Biol.* **7**: 220-227.
- Kamisugi, Y., Schlink, K., Rensing, S.A., Schween, G., von Stackelberg, M., Cuming, A.C., Reski, R., and Cove, D.J.** (2006). The mechanism of gene targeting in *Physcomitrella patens*: homologous recombination, concatenation and multiple integration. *Nucleic Acids Res.* **34**: 6205-6214.
- Neises B. and Steglich W.** (1978). Simple method for the esterification of carboxylic acids. *Angew. Chem. Int. Ed. Engl.* **17**: 522-524.
- Saeed, A.I., Sharov, V., White, J., Li, J., Liang, W., Bhagabati, N., Braisted, J., Klapa, M., Currier, T., Thiagarajan, M., Sturn, A., Snuffin, M., Rezantsev, A., Popov, D., Ryltsov, A., Kostukovich, E., Borisovsky, I., Liu, Z., Vinsavich, A., Trush, V., and Quackenbush, J.** (2003). TM4: a free, open-source system for microarray data management and analysis. *Biotechniques* **34**: 374-378.
